# Supplementary material for: How reversible are the effects of silver nanoparticles on macrophages? A proteomic-instructed view
Source: Royal Society of Chemistry journal article supplement (doi:10.1039/c9en00408d), 2019-01-01
Supplement: c9en00408d1.zip [file c9en00408d1.zip]

## Sheet: Feuil1
Supplementary Table 2: classification of the significantly variable spots according to their expression profiles
blue : fast returning spots (>50% convergence in the return to normal trend)
green : slow returning spots (<50% convergence in the return to normal trend)
orange : slow diverging spots (<50% divergence at the recovery stage compared to the acute stage)
purple : fast diverging spots (>50% divergence at the recovery stage compared to the acute stage)
protein name	accession number	ratio acute/ctrl	T test acute vs ctrl	ratio recovery/ctrl	T test recovery vs ctrl
Casp3	P70677	0.590990174046937	0.0359921367279091	0.997341045531435	0.987502608401317
Capg/1	P24452	0.812860642639505	0.0145019617382288	1.00146035119383	0.972650204437407
Capzb/2	P47757	0.798233454577503	0.0189941285898259	1.00618334791582	0.953808298964753
Hmox2	O70252	1.5332849124461	0.00333074201531809	1.02564250796163	0.68623062524922
Gclm	O09172	1.31654315552637	0.00559154617208382	0.98348383987632	0.859235850682619
Stip1	Q60864	1.71790932368502	0.00293566448476172	0.944408406363965	0.666277751377501
Bvrb	Q923D2	1.44775328912332	0.00762656547467809	0.964427798852345	0.774767591568879
Ppp6	O00743	1.48261059049225	0.0329834292362179	1.04499648781976	0.81913906203059
CatZ	Q9WUU7	1.79383661350142	0.042254419694587	1.07672844313621	0.854135178973109
Tera/2	Q01853	1.48600299724249	0.0240924269944693	1.0565762864783	0.378419137709369
Sars/1	P26638	1.42222742761932	0.0322279720869377	1.05045074888466	0.59429789586912
Pgls/1	Q9CQ60	0.783384074624311	0.0240234589325347	0.96610588794844	0.754172898276328
Tcpa	P11983	1.55075231118599	0.0188934512125918	1.08676080737406	0.545788833275027
Twf1/1	Q91YR1	0.576801528032966	0.000319334723577117	0.931825252778278	0.393144393599705
GalE	Q8R059	0.500556920343391	0.0288089561646536	1.0850947160241	0.504386322112186
Twf1/2	Q91YR1	0.254357455324288	0.00839435463886675	0.859230051941304	0.523926046224074
Vinculin/3	Q64727	1.63333202828985	0.0124992189256546	1.12058891644339	0.280075516353362
Ubl7	Q91W67	0.407363624093774	0.0198886898273878	0.88256145567804	0.54872756512877
Sars/2	P26638	1.51613425213639	0.0362115987324904	1.10381398663314	0.424136029192122
Prps1/1	Q9D7G0	0.688739520942655	0.0107691711947397	0.921534359352068	0.482407170731611
Aars	Q8BGQ7	1.65211117574137	0.00629814372504811	1.17717208368135	0.204252716385177
Guaa	Q3THK7	1.42194074931489	0.0219905150365967	1.11785849733617	0.253781087589113
Stxb2	Q64324	2.06791856331666	0.00217386453336152	1.30032547064064	0.0890805551510994
Ragp1/2	P46061	3.27619916493582	0.0120088261640822	1.67704447346481	0.0815205363141064
Paps1	Q60967	5.54395186628233	0.0442601561333941	2.44456206224059	0.00598985888376348
If4a3	Q91VC3	1.26685706755522	0.0462942866853513	1.08649146488832	0.282045681140451
Psmd2/3	Q8VDM4	1.38887632080239	0.0248771699973841	1.12779778943044	0.166760441115836
Gpd1L	Q3ULJ0	2.26711325691749	0.000979419435476426	1.41704275102865	0.1396306885364
Psme2/2	P97372	1.22197115687529	0.00201344267031276	1.07325473251556	0.340378763780857
Tbcb	Q9D1E6	1.31473192616458	0.0274368467341851	1.105716113283	0.447975178792093
Prps1/3	Q9D7G0	0.522733119525395	0.0117696021639588	0.834713866654535	0.213476579326573
Esd/2	Q9R0P3	0.777860156611917	0.000278191620901123	0.918840010457963	0.149262296844003
Emc2	Q9CRD2	0.564092690150178	0.00713769647137586	0.840626038062673	0.0745977426800519
6pgd/1	Q9DCD0	0.880998846375289	0.0455027060716328	0.95354598798571	0.423223968353902
Actn4/1	P57780	1.44724546721638	0.0435970549031294	1.18477467363772	0.158381398420287
Ndka	P15532	0.42434845940193	0.0304510046919966	0.754875263504935	0.218817194389689
trap1 ac	Q9CQN1	1.74374599101988	0.0167346021878963	1.3199166132136	0.12726272161363
Moesin/5	P26041	1.51658931813773	0.0295748845278103	1.23544846647532	0.0446299297777863
ca13	Q9D6N1	0.621722524530179	0.0143765983072822	0.826525871314447	0.111975868968935
Vat1	Q62465	1.48061006830294	0.00983712435599712	1.22224213178086	0.15481787643996
Hyou1/2	Q9JKR6	1.38477998973019	0.0116651270829415	1.17872953935648	0.0333183797018019
Chm2a	Q9DB34	0.834811003892455	0.00015989538840545	0.921733274849261	0.0888459119737543
Ddx39a	Q8VDW0	1.63566965408582	0.0290755718141465	1.31021947548785	0.0193556127852132
Anxa1	P10107	0.779372081459859	0.0235349822966377	1.10964454823173	0.0630263742818881
Clybl	Q8R4N0	1.80104889621713	0.0251853196607032	1.407314004802	0.188441777988435
Inpp	P49442	2.45514607951883	0.00983447775603691	1.75842821291159	0.169856049962569
Odba	P50136	1.53521251248303	0.0160033949372847	1.2813215582803	0.121700001223953
Cof/2	P18760	1.49353501407559	0.0140944245759288	1.25960650892576	0.0968656869484928
Mdhc/1	P14152	0.474391263683747	0.0239327029245861	0.716896691276177	0.114259569681219
Ddb1/1	Q3U1J4	1.73988439177576	0.039902311764915	1.4028376115852	0.160078558875949
Prps1/2	Q9D7G0	0.574467785180493	0.00259732248388495	0.767341812762798	0.161469248688475
Gelsolin/4	P13020	1.56905633120038	0.0463275931258012	1.32471604519524	0.131485363517431
Aprt/1	P08030	0.51614727166524	0.000169913014423408	0.720157300354409	0.00122785433177128
RhoA	Q9QUI0	0.58554054144427	0.00143713516433252	0.75981770346675	0.0155554982860519
Hyou1/3	Q9JKR6	1.35455379601158	0.00961105931061583	1.20813972657148	0.0530089893911365
Tmem11	Q8BK08	1.7835116799726	0.0401997979239152	1.46053111651005	0.414566360945276
Ddx39b	Q9Z1N5	1.58539675525994	0.0261599849543869	1.347285647828	0.108674659373768
Pa2g4	P50580	1.50385835564154	0.00384132968333542	1.30645513409602	0.0148497274775334
Hmgcl	P38060	0.611799757869006	0.00153721867865106	0.759932225025222	0.0653216070669471
14-3-3 th	P68254	1.31178172501736	0.00720324685070919	1.19326152962874	0.0448783063140497
Actn4/4	P57780	1.44086909948286	0.204515368746338	1.27889627556905	0.0485550500185917
Vime	P20152	1.53956480800152	0.0515977251170516	1.35114384659637	0.0351132613698118
Chip	Q9WUD1	0.58786066323658	0.00459717164133404	0.730844846336728	0.112514437294495
Dcps	Q9DAR7	1.30402853018586	0.00467681796861179	1.20140628998174	0.020451696046283
Pur4/2	Q5SUR0	2.52927028602938	0.00871239309217749	2.01418127557163	0.00976842928510035
Psb3 mod	Q9R1P1	0.472000942802649	0.00656061827339453	0.646085660401286	0.00363129469108287
Tpis/1	P17751	0.742739499534051	0.00887166229185258	0.824228926524361	0.0362346721110541
Actn4/3	P57780	1.2485743565692	0.332730681050817	1.17273153687112	0.0266646187823266
Ldha/1	P06151	0.79444496110206	0.0200871503676333	0.856415912328188	0.0584245032168851
Vma5a/3	Q99KC8	1.84351372358876	0.00353768879071579	1.59444515703956	0.0153895201461568
Gnpda1	O88958	0.472141846078844	0.00182974822025597	0.626534710800867	0.00757487804771203
Prx1ox	P35700	0.58127337809583	0.0182168258332384	0.697688228766628	0.0429844384294026
Tpd52	Q62393	1.42221332248474	0.0382778855323985	1.30500171281849	0.102703568232185
Aacs/2	Q9D2R0	3.12301592051978	0.0054599856267165	2.56001389134699	0.00305699139728459
Tera/4	Q01853	1.47726831324251	0.0967456090555659	1.35169980097587	0.0024141266137787
Tera/3	Q01853	1.39302735272669	0.016249776732126	1.2896452608379	0.0362522262966439
Eef2/5	P58252	1.39159040265635	0.0104321044854065	1.28971244947213	0.00905864302748957
Gmfg	Q9ERL7	0.537478968716115	0.000398817215621315	0.656250382959913	0.000385408911958859
Psb2/1	Q9R1P3	0.672034721538101	0.0225823098860227	0.75618373348132	0.137279626484135
Sw70/2	Q6A028	2.01904413420055	0.0151479945987087	1.76078976849136	0.07985033193094
Spb6/1	Q60854	1.65910208401501	0.0182970764517937	1.49241297679489	0.0146852237678041
Pfkl	P12382	1.83059705324031	0.00678425689113116	1.6212669167	0.026296337040177
Mss4	Q91X96	0.517243023088601	0.0433120663687425	0.637002714309595	0.0969717148483704
Rs4y1	P62702	0.500697867434114	0.0373278292362835	0.622334375689404	0.0738670158878439
Vdac2	Q60930	0.633972021415951	0.0223176273585546	0.720747121249666	0.0517870614840822
Efhd2	Q9D8Y	1.23820407348317	0.0162166396627496	1.18239901226139	0.225238171366645
Anxa2/2	P07356	0.439787458351982	0.000154749491127742	0.559941149352384	0.00186967957005015
Spee	Q64674	1.54557652916772	0.0164556215812923	1.42967167081219	0.0654466461992948
Idhc	O88844	1.23658474555441	0.0162002314067496	1.18667206273987	0.00213892818977036
Aldr/1	P45376	0.573465883567192	0.00649731686819813	0.659527007246406	0.0109628182351596
Sw70/1	Q6A028	1.62617500876042	0.0248499071792216	1.50121410711427	0.199998008859586
Ran/1	P62827|	0.834736067051064	0.0353262258803521	0.866568921704548	0.124821612978283
Cdk6	Q64261	0.714322244839745	0.0357880641960562	0.769192461116876	0.0196800905265727
PPp1r7/2	Q3UM45	0.671019121397183	0.0203868992106202	0.734163352019623	0.0786209396494327
Psa5/1	Q9Z2U1	0.801255138035856	0.00552600107338447	0.838407390783968	0.105491574021335
Bvra/1	Q9CY64	0.535616061850811	0.0150079070877729	0.620718058676129	0.0261850453689003
Esd/1	Q9R0P3	0.558429869626157	0.00448606272187979	0.638379620764029	0.0132253594974689
Eno1a/4	P17182	1.5037487067891	0.00216629980150941	1.41523893783496	0.00172133993082578
If5a/1	P63242	0.540421055956806	0.00193463165962105	0.620934398939549	0.0041753051412545
In35	Q9D8C4	1.25136493066645	0.0392694742172149	1.20740994428283	0.137799016556005
Frih	P09528	0.606530714854382	0.00722097444650648	0.674225510695593	0.0154448485814515
Idi1	P58044	1.40337724355181	0.0156160055756954	1.34085171547155	0.00650432204374084
Pnph/2	P23492	1.24985685558066	0.0226468115217925	1.2166512243937	0.0828636671261551
Hxk3/1	Q3TRM8	1.91431648548001	0.0180219988796445	1.79762688555321	0.0253739031900138
Anxa3	O35639	1.34292159897876	0.0092709282316323	1.29928619511695	0.0236756386749625
Actn4/2	P57780	1.43317224608343	0.0432021708294705	1.37834521813349	0.0078106557682826
PPp1r7/1	Q3UM45	0.299301713877444	0.0237776667650811	0.384882160133536	0.0382734972510276
Prs8/1	P62196	0.603297224256831	0.000405201661177466	0.651293846187061	0.000782341756473332
Ndrg1/2	Q62433	1.37801432306598	0.014926902124282	1.33492049264974	0.0243408030410915
Tctp/2	P63028	0.835403266588145	0.0311655582257994	0.853433146121384	0.0462251123021857
Arpc2/2	Q9CVB6	0.757837117892333	0.0420376127137324	0.783665840655913	0.0565515528267828
Gapdh	P16858	0.561021449430213	0.00126838186080881	0.602895409760049	0.00210453448709295
Gt25c	Q8K297	1.52670134611702	0.00884461069074695	1.47963165309673	0.00509853493766281
Pfkap	Q9WUA3	0.844833782205799	0.00576695141693253	0.858462895697973	0.0086572466915001
Ruvb2	Q9WTM5	1.45969783724182	0.0600724889483524	1.42382764034092	0.0372645348362984
If4a1	P60843	1.55467108669003	0.00966328693522477	1.51182715509189	0.00946015815670194
Nsf1c	Q9CZ44	1.55467108669003	0.00966328693522477	1.51182715509189	0.00946015815670194
Vps35/1	Q9EQH3	2.4393183141915	0.158019840373388	2.33043276905581	0.00318985496020554
Capza2	P47754	1.29813831681049	0.00755453214350589	1.27814969441365	0.0101444709478308
Psmd2/2	Q8VDM4	1.09999155559812	0.105864492400706	1.09371564018179	0.0195345598370397
Mdhc/2	P14152	0.826409109135586	0.00625423016951773	0.837078480238066	0.00781633612015322
Cdk4	P30285	0.691741160865308	0.00281876981116771	0.706894539785991	0.00146691094509768
Atpb/2	P56480	1.5989545682033	0.0362108418403381	1.57576600122338	0.000616481695710265
Snd1/1	Q78PY7	0.64841339862106	0.0317621082705474	0.66133583037763	0.041302045527611
Tpis/3	P17751	1.44904102198484	0.0381804786636745	1.43306093667829	0.0534397307761878
Prs8/2	P62196	0.84896393141118	0.0435548139029083	0.854265575577061	0.22192038248491
Taldo/1	Q93092	1.24165649570113	0.0218762397251876	1.23348307095854	0.000588894027631497
Spb6/2	Q60854	1.43081468635459	0.0132382447846322	1.41692281923862	0.0148334757534489
Hxk3/2	Q3TRM8	1.22815259307391	0.0395654683720498	1.22160550869761	0.0880011601863458
Btf3/2	Q64152	0.756131446235563	0.0454752989891826	0.762615981735995	0.0492153870310574
Pcna/1	P17918	0.566243015235171	0.000341885605266839	0.569958468508531	0.0019240342777662
Igbp1	Q61249	1.36432070788462	0.059695130002845	1.36304826792447	0.0393700403433669
Psa2/1	P49722	0.580934378529645	0.00313250667516947	0.582156899243958	0.00281375765080368
Psme1	P97371	1.39971964583675	0.00481702468177094	1.39861881800081	0.00191894348028195
Psmd7	P26516	0.678212011784492	0.0296321190271695	0.678420914146346	0.0220553914775387
Hxk3/3	Q3TRM8	1.51777935149527	0.0175962853200469	1.52351426132963	0.0182372969251615
Clic4/2	Q9QYB1	1.26875500300078	0.0167124036717945	1.27459611231748	0.0401289915503539
Lasp1	Q61792	0.407054256742714	0.000285970852358954	0.382071707683454	0.0000898777739791843
Gbb1	P62874	1.16770801986525	0.0334999126787522	1.17546301170244	0.0276995691302484
Cof/1	P18760	0.742510321213402	0.000106820971104617	0.730222383222667	0.00171411190959643
Mdhc/3	P14152	1.38313595086376	0.0216727067965924	1.40159580712234	0.000630064389576953
ExoS6	Q8BTW3	1.50312029893964	0.0162157134371605	1.53193340301289	0.00869763736628905
Pfd2	O70591	0.716328916850638	0.00915621127139144	0.699963479013228	0.00539861881174813
Vta1	Q9CR26	2.84434506229862	0.0140026687813507	2.96594600265771	0.0176776145390121
Csn4	O88544	1.33955650358998	0.027507763330718	1.36551495170829	0.0315618383445221
Anxa4	P97429	1.30348935799009	0.0145242409278722	1.33254363093876	0.00233750251681797
GalK	Q9R0N0	1.45118182901063	0.00359586309428111	1.50019649833152	0.0334621956948012
Bpnt1	Q9Z0S1	1.77475604305355	0.0184921489794028	1.867037510887	0.0117422261758225
Arpc2/1	Q9CVB6	0.573563157701482	0.0273496566263324	0.519931353389029	0.0197232722176121
Pcna/2	P17918	0.822586366036606	0.0166009023669397	0.800127629382406	0.0263288842850166
Btf3/1	Q64152	0.561231661093093	0.006943202465466	0.503902325236076	0.0055914434000117
Taldo/3	Q93092	0.811006091403874	0.059002584548991	0.786227557558247	0.020060344318169
Ppce/2	Q9QUR6	1.5805432830019	0.0411409093630308	1.65675601430422	0.0105102282638522
Rhogdi1/1	Q99PT1	0.711797769165862	0.000975272964328016	0.67138923560976	0.00173791733417369
Tctp/1	P63028	0.601650526410063	0.0009905073963517	0.544639219164439	0.000398189742091912
Lgul/1	Q9CPU0	0.802050827543148	0.0433091873893433	0.773408368188434	0.0464206347669417
5nt3b	Q3UFY7	1.5539724886202	0.00331312507885899	1.63509545845952	0.0110942845325282
CopE	O89079	1.35478849055237	0.013375326241922	1.40930652644775	0.0667158618480258
Hsp74/4	Q61316	1.26082087395154	0.15014748584135	1.30657913538286	0.00218733111196824
Stmn/2	P54227	0.597638101700158	0.0164668199758886	0.526771928926494	0.0112828821143393
Snd1/2	Q78PY7	0.585569062649512	0.0216727717302359	0.503990485156688	0.00934235074910916
Rla0	P14869	1.2764116050518	0.0650704637382153	1.33107056357576	0.0376697999159252
Psb4/1	P99026	0.743620433498849	0.0486528659915637	0.687359919433467	0.0302386157142655
Cof/3	P18760	0.673094207509073	0.0501718950915222	0.596419747148174	0.028238486224267
Prx6/1	O08709	0.561180277410846	0.0223040992251668	0.453353680663922	0.00808963707258251
Rhogdi2/1	Q61599	0.635769105327954	0.000826347326019083	0.543897339165759	0.00147685642558256
Fam49b	Q921M7	1.47127505397787	0.0198183071096903	1.59080670930952	0.0545098750846712
Cab39	Q06138	0.695472158159168	0.0270788165347253	0.618008302210999	0.00407637526324843
CatD	P18242	1.38087559166185	0.00651918853476415	1.48484437348423	0.00291302454198425
Ncf4	P97369	1.15024151443269	0.022063263624244	1.1934368846716	0.00888234867541777
Actin	P60710	1.51310545890627	0.00410841304209064	1.66525546905901	0.0136654492932858
Gnai2/2	P08752	1.51310545890627	0.00410841304209064	1.66525546905901	0.0136654492932858
Vps35/2	Q9EQH3	1.79515973310268	0.173354395275035	2.03386070112671	0.010553165464127
Twf2	Q9Z0P5	0.704131587934829	0.0130022743283704	0.600194458430656	0.00716678971718327
Pef1	Q8BFY6	0.635860615106968	0.0530778855448653	0.499500095014065	0.0190364166810416
Pur9	Q9CWJ9	1.16418441871567	0.273376133584901	1.22591683468092	0.00750061453160842
Snap23	O09044	0.527772629364902	0.0167915748977771	0.342534163267335	0.00523805420920537
Prx3/2	P20108	1.22741627771613	0.0640626585042154	1.31900174816542	0.00762266012520131
Akr1b1	P45376	1.17848861008845	0.0374203214670351	1.25045182809008	0.00881277465571444
Ppt1	O88531	1.24007296339061	0.144593787071791	1.33948764340095	0.025266265353243
Gatm	Q9D964	0.682322188414246	0.00905072893345131	0.5400090114674	0.0117799837615215
Erp29	P57759	0.77685303204577	0.123696240636192	0.676537110630495	0.0466255604254524
Aldr2	P47738	1.15890452646702	0.0842787652172858	1.23189468724795	0.00144523398493481
Pipna	P53810	1.2221926820425	0.113998792776244	1.32460157482157	0.0092163628879473
Mbd3	Q9Z2D8	1.5226684799996	0.0186584123368449	1.77191850551219	0.00316767748847487
Anxa6	P14824	1.54210997062973	0.0191914319584017	1.80304886694041	0.00430855428231247
Dpp3/2	Q99KK7	1.5459003214459	0.0377666866283197	1.83555321379811	0.00135443133852903
Phb	P67778	1.11649554217581	0.161919469556148	1.18117246585293	0.0499900761226916
Anxa5/1	P48036	0.876353268613551	0.0158813281235334	0.80770408737428	0.00341548135754988
Eef2/1	P58252	0.766524857957407	0.0165555337399356	0.634631176271407	0.00495214842256219
Pdxk	Q8K183	1.28645715567856	0.00196158174882726	1.44890902591836	0.0150127172559692
Dyncli2/2	O88487	1.43258874814671	0.255774421073502	1.68577981827824	0.0430021110056872
Taldo/4	Q93092	1.22397117086239	0.0640487522470898	1.35523892278429	0.0188493661194185
Ppp1ca	P62137	1.16927912427015	0.0685713380971881	1.27134186388065	0.0160881797016188
Asna1	O54984	1.28894207748362	0.0904347593500927	1.46442006859014	0.00194255715575805
Mlec	Q6ZQI3	1.4887581005151	0.0172890553156379	1.79126528257626	0.000894930733364845
Pgp	Q8CHP8	1.37096067169536	0.0175280351125064	1.6007928662223	0.051005005344175
Ndrg1/1	Q62433	1.31542740040101	0.0855592169907198	1.51610777086312	0.041246321571928
Arp2/3	P61161	1.19189054747734	0.036330452696933	1.31944927379173	0.0000678866738848777
Oat	P29758	1.30055948228684	0.0452262053351865	1.50482468281053	0.00663829261633169
Taldo/5	Q93092	0.798449342977662	0.0166123547733377	0.656709325318888	0.000786563722320274
Aldr/2	P45376	0.842929704920231	0.0934085081831896	0.730581481514551	0.0353300907169134
Prx4	O08807	0.748165724599587	0.0629041533985683	0.564674166173751	0.0120204873599133
Gnb2L1	P68040	0.892224535815851	0.0203913575726761	0.811126506099475	0.00180640922193178
Atpb/1	P56480	1.2285777753096	0.160647607802025	1.40734158938191	0.0253239934846227
Arpc5/1	Q9CPW4	0.588156636366214	0.030185636517159	0.252403812871737	0.00687390007736504
Snaa	Q9DB05	1.53074730080169	0.00134469897846165	1.98694769694585	0.0464090184599964
Stmn/3	P54227	0.83831870291372	0.189728495011051	0.696848010812069	0.00907280487643422
Anxa2/1	P07356	0.786797486125436	0.00978624779361837	0.59857125204571	0.000395162807282932
If3g	Q9Z1D1	0.772643346200658	0.31326020685388	0.564584271140345	0.0255431419570916
Sps1	Q8BH69	1.49001511751872	0.0189578235157429	1.95212900783483	0.0127595332535904
Ppce/1	Q9QUR6	1.39925721970286	0.148889597259201	1.77919419036231	0.00828661376079674
Stmn/1	P54227	0.879719143659994	0.141142690992711	0.759289975658014	0.0143296624037102
Sf3b2/2	Q3UJB0	1.15515936613529	0.438965129002791	1.3172992425372	0.00294530580784933
Nduv2	Q9D6J6	1.23664864838698	0.0118691569720921	1.4883558356979	0.0502244190233687
Psb10	O35955	0.726947239304618	0.122001397345753	0.430698794536188	0.0160985172561301
Pgls/2	Q9CQ60	1.10571793616995	0.158842489940938	1.22102804299766	0.00720118516772836
Nt5c	Q9JM14	1.18427518122058	0.0783861762035323	1.38535578994442	0.0344328858885416
Acadl	P51174	1.12825866204372	0.135876563785049	1.26902364926255	0.00828213474394207
14-3-3 gam/1	P61982	0.847509067933398	0.28062497012391	0.672210887984789	0.0212769550143351
Arp2/1	P61161	0.897839089467118	0.0567759471339332	0.762323807280144	0.00398985561356498
Vps35/3	Q9EQH3	1.53027474436243	0.334424113897404	2.24639142732059	0.00295953836626148
Ml12b	Q3THE2	0.923907887831469	0.512178757967786	0.813764517329572	0.00539262818148143
Anxa7/2	Q07076	1.16438938790926	0.372528265865122	1.40632728020725	0.00939748440142227
Dpp3/1	Q99KK7	1.27613609397931	0.21748372410723	1.75326240656175	0.000133388791781276
Lypla2	Q9WTL7	1.0725503395489	0.276499333458058	1.21550605524172	0.018345948121772
Sf3b2/3	Q3UJB0	1.2625575501093	0.37866435852339	1.79871088826651	0.000187422522100873
Clpp	O88696	1.27626339969372	0.332966984029036	1.84196018376723	0.023817709085475
Cbx1	P83917	0.908405083509847	0.268474915122963	0.71985816337425	0.000703515682800093
ExoS4	Q921I9	0.879390412508859	0.422617762640591	0.511510395083667	0.0218967865848992
Anxa7	Q07076	1.13559785779246	0.444114925142622	1.56520735178332	0.0220127063004167
Ragp1/1	P46061	1.16238608340274	0.368506109907107	1.87778022920029	0.00161556081497961
Dyncli2/1	O88487	1.20636909482139	0.493041679401913	2.19588159813474	0.0012855782543586
Grb2	Q60631	1.05802440924512	0.833606454818829	1.46123719872961	0.0203805356688762
Mtap	Q9CQ65	1.03576853498767	0.834094744824897	1.29729968052273	0.0224823795339042
Psmd14	O35593	1.03243815334001	0.60788671558569	1.31702830826027	0.00242539510459981
Mgn	P61327	0.956053482305219	0.597888141961397	0.56264662304143	0.00708933943185958
Lxn	P70202	0.976782891999059	0.800507429708769	1.25502391939737	0.00349560211382245
Psme2/1	P97372	0.998327836521365	0.975184609989501	0.710457757680757	0.00346530303762319
