# Supplementary material for: How reversible are the effects of silver nanoparticles on macrophages? A proteomic-instructed view
Source: Royal Society of Chemistry journal article supplement (doi:10.1039/c9en00408d), 2019-01-01
Supplement: c9en00408d1.zip [file c9en00408d1.zip]

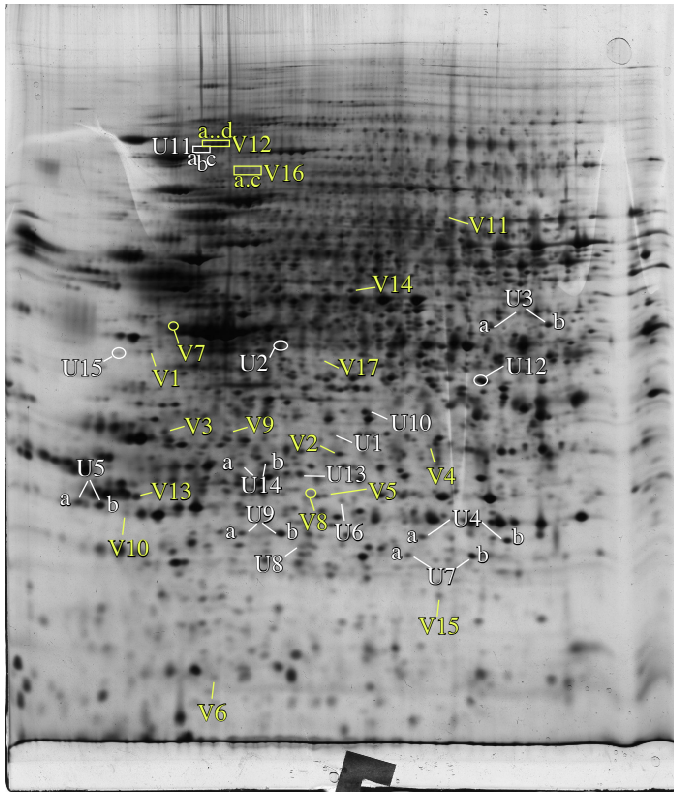

A

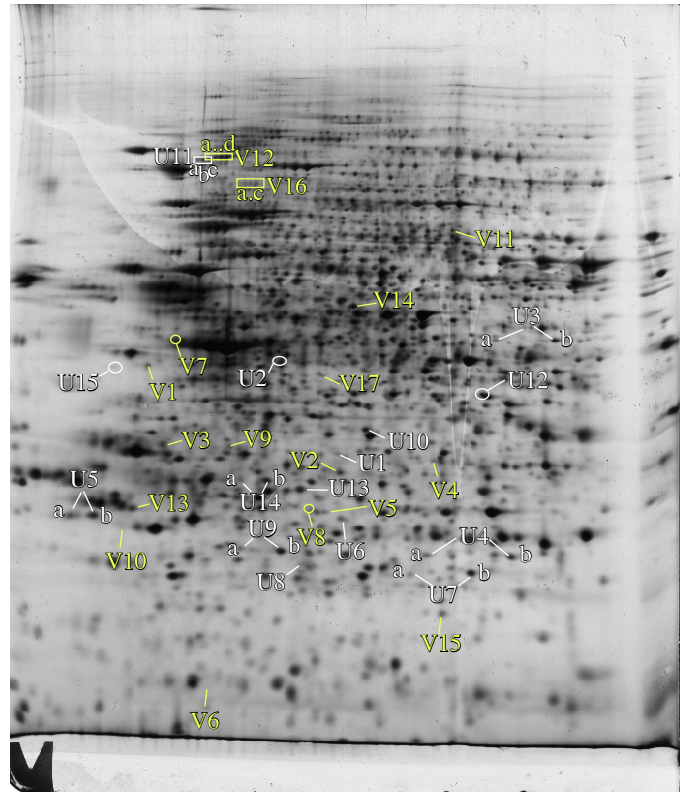

B

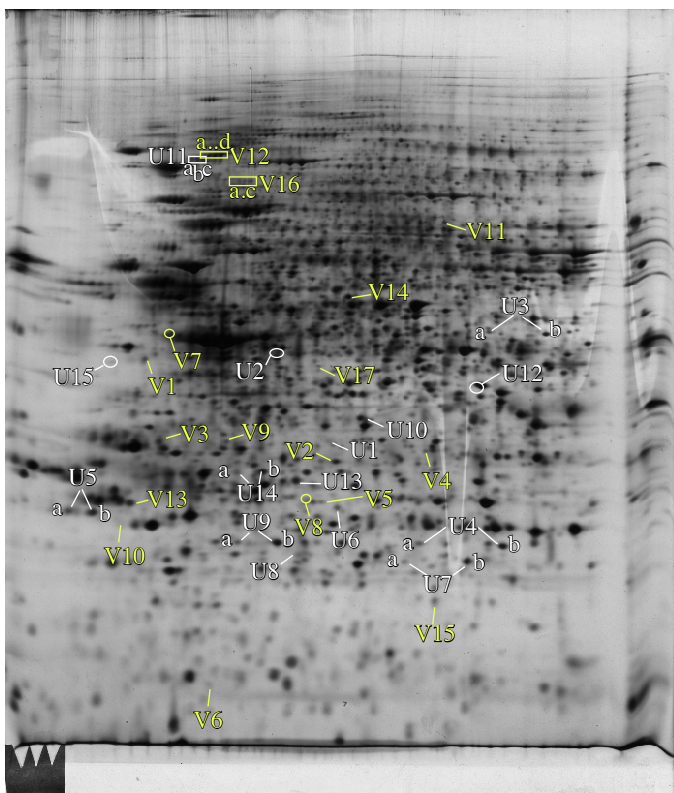

C

### Supplementary Figure 5 : Proteomic analysis of total cell extracts by 2D electrophoresis

Total cell extracts of RAW274.7 cells were separated by two-dimensional gel electrophoresis. The first dimensions covered a 4-8 pH range and the second dimension a 15-200 kDa range. Total cellular proteins (150  $\mu$ g) were loaded on the first dimension gel.

A: gel obtained from control cells.  
B: gel obtained from cells treated for 24 hours with 20  $\mu$ g/ml silver nanoparticles  
C: gel obtained from cells treated for 24 hours with 20  $\mu$ g/ml silver nanoparticles and left to recover for 72hours

Only the proteins implied in the ubiquitin proteasome system (U) and in vesicular transport (V) are shown in this figure
